# Supplementary material for: Advancements, Challenges, and Future Directions in Aquatic Life Criteria Research in China
Source: MDPI journal article supplement (doi:10.3390/toxics11100862), 2023-10-16
Supplement: s1 [file s1]

# Advancements, Challenges, and Future Directions in Aquatic Life Criteria Research in China

Chen Liu <sup>1</sup>, Zhaomei Geng <sup>2</sup>, Jia-yin Xu <sup>1,3</sup>, Qing-Wei Li <sup>1,3</sup>, Heng Zhang <sup>1,3</sup> and Jin-Fen Pan <sup>1,4\*</sup>

1 Key Laboratory of Environment and Ecology (Ministry of Education), Ocean University of China, Qingdao 266100, China

2 School of Mathematics, Sun Yat-Sen University, Guangzhou 510275, China

3 Key Laboratory of Marine Eco-Environmental Science and Technology, First Institute of Oceanography, Ministry of Natural Resources, Qingdao 266061, China

4 Laboratory for Marine Ecology and Environmental Science, Laoshan Laboratory, Qingdao 266200, China

\*Corresponding author: jfpan@ouc.edu.cn (J.-F.P.)

## **Supplementary materials**

Two Tables:

Table S1: Recommended Chinese resident freshwater test organisms for the development of ALC.

Table S2: Evaluation criteria for toxicity data in China's aquatic life criteria (ALC) development.

Table S1 Recommended Chinese resident freshwater test organisms for the development of ALC.

| No. | Scientific name                    | Taxonomy        |                  |
|-----|------------------------------------|-----------------|------------------|
| 1   | <i>Hydra oligactis</i>             | Cnidaria        | Hydridae         |
| 2   | <i>Hydra viridis</i>               | Cnidaria        | Hydridae         |
| 3   | <i>Hydra vulgaris</i>              | Cnidaria        | Hydridae         |
| 4   | <i>Dugesia japonica</i>            | Platyhelminthes | Tricornericidae  |
| 5   | <i>Brachionus calyciflorus</i>     | Rotifera        | Brachiopodiaceae |
| 6   | <i>Keratella cochlearis</i>        | Rotifera        | Brachiopodiaceae |
| 7   | <i>Lecane quadridentata</i>        | Rotifera        | Coelomonaceae    |
| 8   | <i>Branchiura sowerbyi</i>         | Annelida        | Tubificidae      |
| 9   | <i>Tubifex tubifex</i>             | Annelida        | Tubificidae      |
| 10  | <i>Semisulcospira libertine</i>    | Mollusca        | Thiaridae        |
| 11  | <i>Lymnaea stagnalis</i>           | Mollusca        | Spirulinae       |
| 12  | <i>Corbicula fluminea</i>          | Mollusca        | Corbiculidae     |
| 13  | <i>Daphnia magna</i>               | Arthropoda      | Daphniidae       |
| 14  | <i>Daphnia pulex</i>               | Arthropoda      | Daphniidae       |
| 15  | <i>Daphnia cucullata</i>           | Arthropoda      | Daphniidae       |
| 16  | <i>Daphnia hyaline</i>             | Arthropoda      | Daphniidae       |
| 17  | <i>Simocephalus serrulatus</i>     | Arthropoda      | Daphniidae       |
| 18  | <i>Ceriodaphnia dubia</i>          | Arthropoda      | Daphniidae       |
| 19  | <i>Gammarus pulex</i>              | Arthropoda      | Gammaridae       |
| 20  | <i>Gammarus lacustris</i>          | Arthropoda      | Gammaridae       |
| 21  | <i>Macrobrachium nipponense</i>    | Arthropoda      | Palaemonidae     |
| 22  | <i>Eriocheir sinensis</i>          | Arthropoda      | Grapsidae        |
| 23  | <i>Baetis Rhodani</i>              | Arthropoda      | Ephemeraceae     |
| 24  | <i>Heptagenia sulphurea</i>        | Arthropoda      | Heptageniidae    |
| 25  | <i>Contaminated Brachythemis</i>   | Arthropoda      | Libellulidae     |
| 26  | <i>Cyprinus carpio</i>             | Chordate        | Cyprinidae       |
| 27  | <i>Ctenopharyngodon idellus</i>    | Chordate        | Cyprinidae       |
| 28  | <i>Hypophthalmichthys molitrix</i> | Chordate        | Cyprinidae       |
| 29  | <i>Aristichthys nobilis</i>        | Chordate        | Cyprinidae       |
| 30  | <i>Carassius auratus</i>           | Chordate        | Cyprinidae       |
| 31  | <i>Pseudorasbora parva</i>         | Chordate        | Cyprinidae       |
| 32  | <i>Misgurnus anguillicaudatus</i>  | Chordate        | Cobitidae        |
| 33  | <i>Pelteobagrus Fulvidraco</i>     | Chordate        | Coelomeraceae    |
| 34  | <i>Monopterus albus</i>            | Chordate        | Synbranchiidae   |
| 35  | <i>Siniperca chuatsi</i>           | Chordate        | Percichthyidae   |
| 36  | <i>Spiny Quasipaa</i>              | Chordate        | Ranidae          |

|    |                                        |                 |                   |
|----|----------------------------------------|-----------------|-------------------|
| 37 | <i>Chlamydomonas reinhardtii</i>       | Chlorophyta     | Chlamydomonadacea |
| 38 | <i>Pseudokirchneriella subcapitata</i> | Chlorophyta     | Chlorella         |
| 39 | <i>Scenedesmus acutus</i>              | Chlorophyta     | Scenedesmaceae    |
| 40 | <i>Navicula pelliculosa</i>            | Bacillariophyta | Naviculaceae      |
| 41 | <i>Salvinia natans</i>                 | Pteridophyta    | Robiniaceae       |
| 42 | <i>Lemna minor</i>                     | Angiosperms     | Lemnaceae         |
| 43 | <i>Spirodela polyrrhiza</i>            | Angiosperms     | Lemnaceae         |
| 44 | <i>Potamogeton crispus</i>             | Angiosperms     | Potamogetonaceae  |
| 45 | <i>Hydrilla verticillata</i>           | Angiosperms     | Hydrocharitaceae  |
| 46 | <i>Ceratophyllum demersum</i>          | Angiosperms     | Ceratophyllaceae  |

---

Table S2 Evaluation criteria for toxicity data in China's aquatic life criteria (ALC) development.

| Item No.             | Evaluation criteria                                                                             | Scoring options (answers and scores*)                             |
|----------------------|-------------------------------------------------------------------------------------------------|-------------------------------------------------------------------|
| Data sources         |                                                                                                 |                                                                   |
| 1                    | Do the data come from regular papers or authoritative reports?                                  | Yes (2), No (Invalid)                                             |
| 2                    | Is the full-text paper or report available?                                                     | Yes (2), No (Invalid)                                             |
| 3                    | Are the toxicity data on an individual level?                                                   | Yes (2), No (Invalid)                                             |
| 4                    | Did the toxicity data come from a resident species?                                             | Yes (2), No (Invalid)                                             |
| Test substances      |                                                                                                 |                                                                   |
| 5                    | Did the test substances have a definite name and appropriate chemical form?                     | Yes (3), No (0)                                                   |
| 6                    | Were the test substances of an analytical grade or of the highest purity available?             | Yes (3), No (0)                                                   |
| Test organisms       |                                                                                                 |                                                                   |
| 7                    | Were the characteristics of the test organism reported (such as body length, body weight, age)? | Yes (4), No (0)                                                   |
| 8                    | Was the test organism free from pre-exposure to the test substance?                             | Yes (4), No (Invalid)                                             |
| 9                    | Was the non-lethal performance of the control organism normal?                                  | Yes (4), No (0)                                                   |
| Experimental process |                                                                                                 |                                                                   |
| 10                   | Has the contamination of the control group been tested?                                         | Yes (3), No (0), The control group species was polluted (Invalid) |
| 11                   | Did the test process meet the test method standards?                                            | Yes (4), No (0)                                                   |
| 12                   | Was a suitable control group designed (blank control and cosolvent control, etc.)?              | Yes (4), No (Invalid)                                             |
| 13                   | Did the control and test groups contain duplicates?                                             | Yes (4), No (0)                                                   |
| 14                   | Did the test medium meet the requirements (freshwater, seawater, etc.)?                         | Yes (4), No (Invalid)                                             |
| 15                   | Did the literature report the type of exposure (static, flow-through, etc.)?                    | Yes (4), No (0)                                                   |
| 16                   | Did the test organism have an appropriate exposure time?                                        | Yes (8), No (0)                                                   |
| 17                   | Did the experiment have appropriate acute or chronic toxicological endpoints?                   | Yes (10), No (Invalid)                                            |
| 18                   | Was the chemical concentration of the solution measured?                                        | Yes (4), No (0)                                                   |
| 19                   | If necessary, has a reference substance toxicity test been conducted?                           | Yes (4), No (0)                                                   |
| 20                   | Was the ratio between the concentration of the test solution appropriate?                       | Yes (4), No (0)                                                   |
| 21                   | Was the load of the test organism in the test system appropriate?                               | Yes (4), No (0)                                                   |
| Experimental results |                                                                                                 |                                                                   |
| 22                   | Was the dose-response relationship expressed?                                                   | Yes (4), No (0)                                                   |

|             |                                                                                                                                                                                                                                       |                                          |
|-------------|---------------------------------------------------------------------------------------------------------------------------------------------------------------------------------------------------------------------------------------|------------------------------------------|
| 23          | Was the correct statistical method used to obtain the results?                                                                                                                                                                        | Yes (4), No (0)                          |
| 24          | For the lethal concentration (LC) or effect concentration (EC), was a confidence interval provided? For the no observed effect concentration (NOEC) or lowest observed effect concentration (LOEC), was it statistically significant? | Yes (4), No (0)                          |
| 25          | Was the monitoring of water quality parameters that may affect the toxicity of pollutants adequate?                                                                                                                                   | Yes (5), Basically yes (3), No (Invalid) |
| Total score |                                                                                                                                                                                                                                       | 100                                      |

\*The results of “invalid” indicate the data cannot be accepted to be used for deriving WQC.

**Data Classification:**

Total score  $\geq$  80: High-quality data

80 > Total score  $\geq$  60: Acceptable data

60 > Total score: Unacceptable data
